# Supplementary material for: A novel modified electrode based on terbium oxide and carbon nanotubes for the simultaneous determination of methyldopa and paracetamol
Source: Royal Society of Chemistry journal article supplement (doi:10.1039/c6ay00969g), 2016-01-01
Supplement: c6ay00969g1.pdf [file c6ay00969g1.pdf]

Analytical Methods  
Electronic Supplementary Information File

**A novel modified electrode based on terbium oxide and carbon nanotubes  
for the simultaneous determination of methyldopa and paracetamol**

Aysegul Kutluay Baytak<sup>a</sup>, Sehiban Duzmen<sup>b</sup>, Tugce Teker<sup>b</sup>, Mehmet Aslanoglu\*<sup>b</sup>

*<sup>a</sup>Department of Medical Laboratory, Vocational School of Health Services, Harran  
University, Şanlıurfa 63510, Turkey*

*<sup>b</sup>Department of Chemistry, Harran University, Şanlıurfa 63510, Turkey*

\*Corresponding author:

Email: [maslanoglu@harran.edu.tr](mailto:maslanoglu@harran.edu.tr)

Phone: +904143183000 ext 3584

Fax: +904143183541

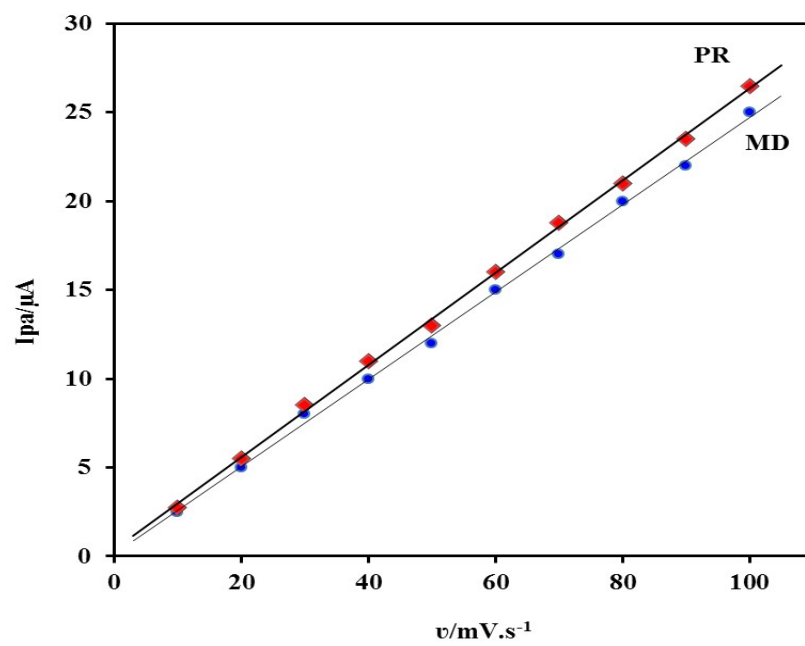

**Fig. S1.** Plots of anodic peak currents of PR and MD versus scan rate.

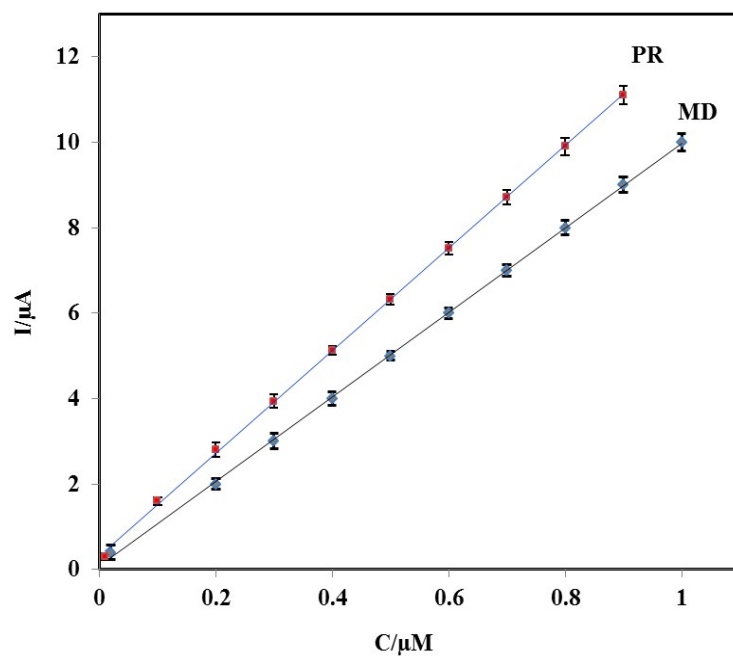

**Fig. S2.** Plots of peak currents of MD and PR versus concentrations.

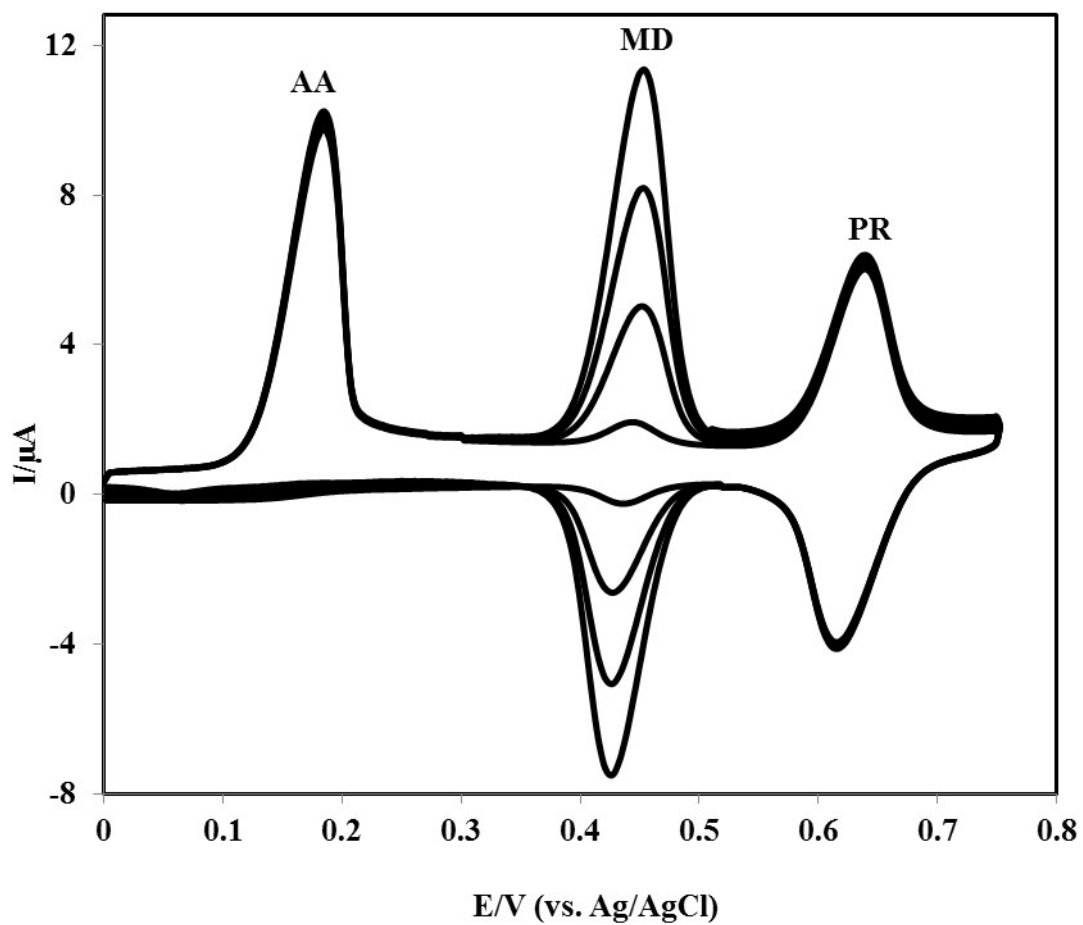

**Fig. S3.** Cyclic voltammograms of  $1.0 \times 10^{-5}$  M AA,  $2.5 \times 10^{-7}$  M PR and increasing concentrations of MD at  $\text{Tb}_4\text{O}_7\text{NPs/CNTs/GCE}$  in 0.1 M PBS at pH 4.0. MD concentrations:  $8.0 \times 10^{-8}$  M;  $2.0 \times 10^{-7}$ ;  $4.0 \times 10^{-7}$ ;  $6.0 \times 10^{-7}$  M. Scan rate: 50 mV/s.

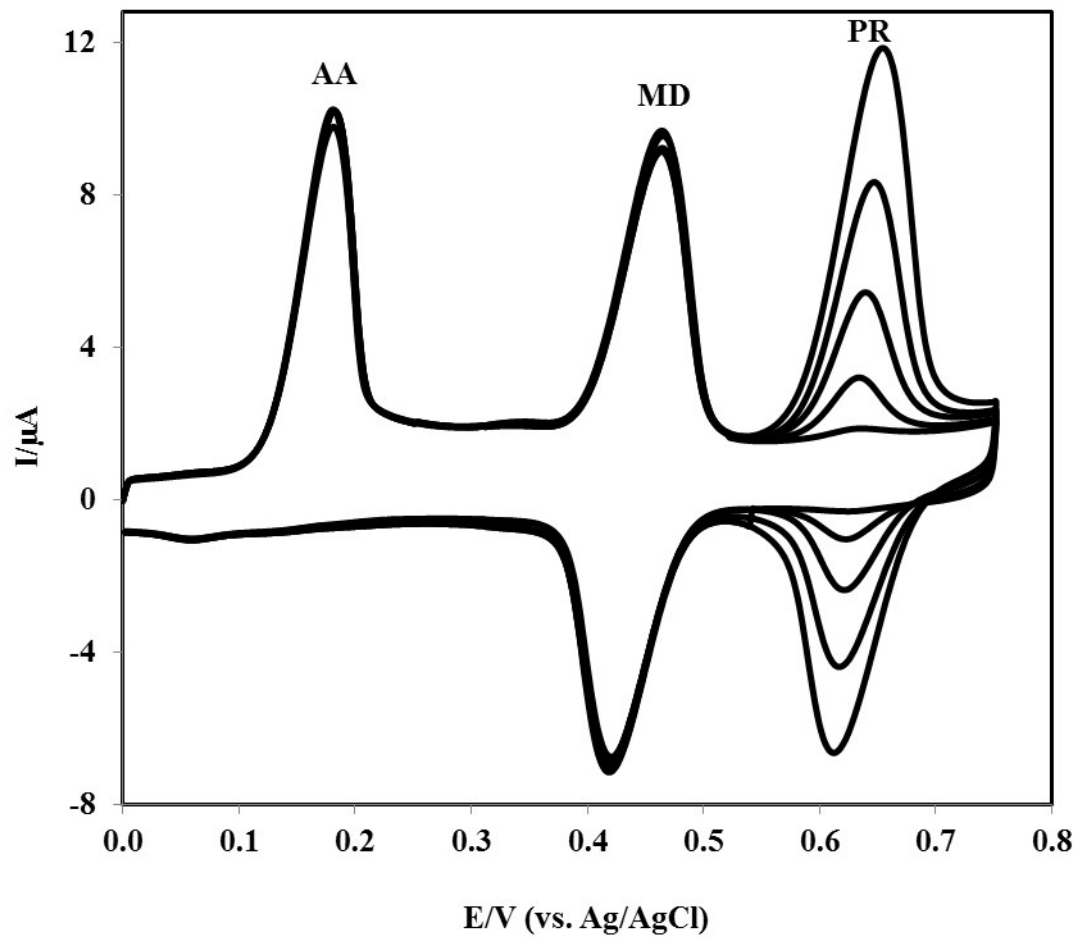

**Fig. S4.** Cyclic voltammograms of  $1.0 \times 10^{-5}$  M AA,  $5.0 \times 10^{-7}$  M MD and increasing concentrations of PR at  $\text{Tb}_4\text{O}_7\text{NPs/CNTs/GCE}$  in 0.1 M PBS at pH 4.0. PR concentrations:  $7.5 \times 10^{-8}$  M;  $1.5 \times 10^{-7}$ ;  $3.0 \times 10^{-7}$ ;  $4.0 \times 10^{-7}$  M;  $7.5 \times 10^{-7}$  M. Scan rate: 50 mV/s.

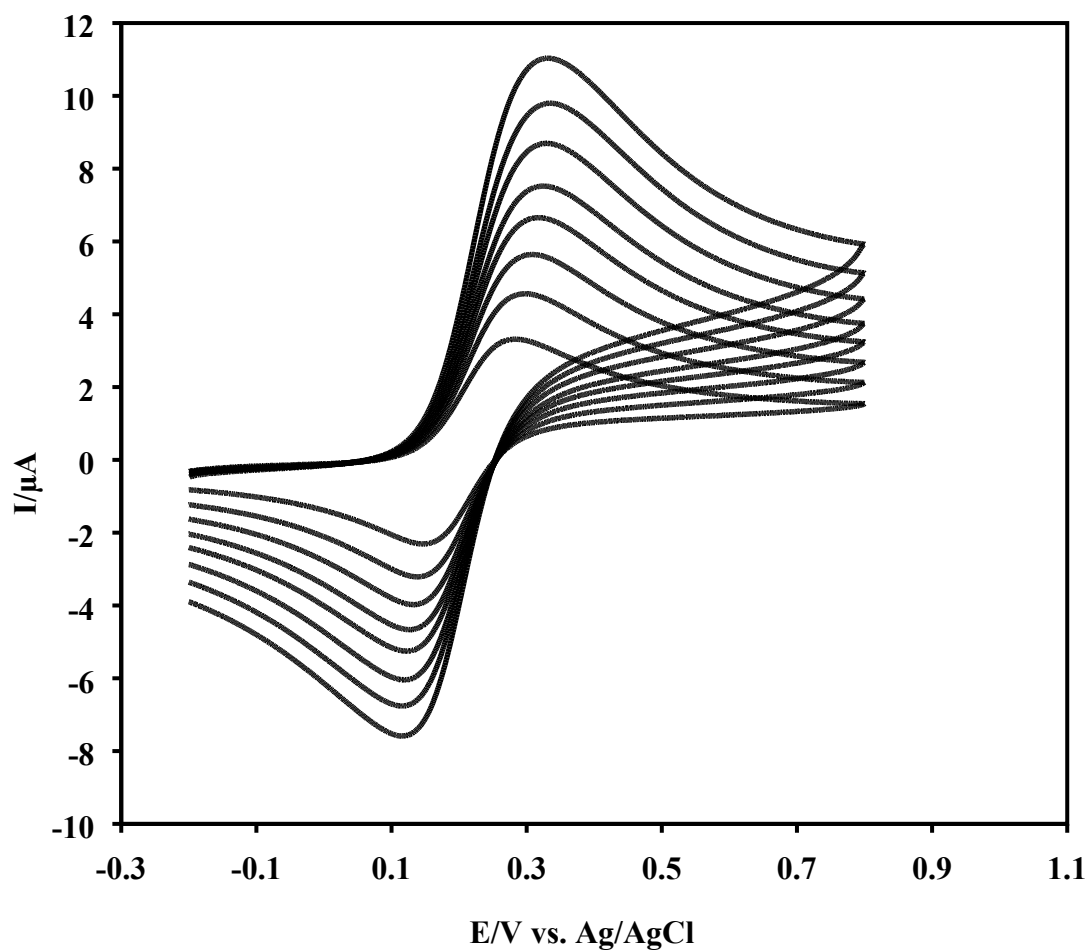

**Fig. S5.** Cyclic voltammograms of 1 mM potassium ferrocyanide<sup>-</sup> in 0.1 M KCl, pH 4 at different scan rates using bare GCE. Scan rates: 25 mV; 50 mV; 75 mV; 100 mV; 125 mV; 150 mV; 175 mV; 200 mV.

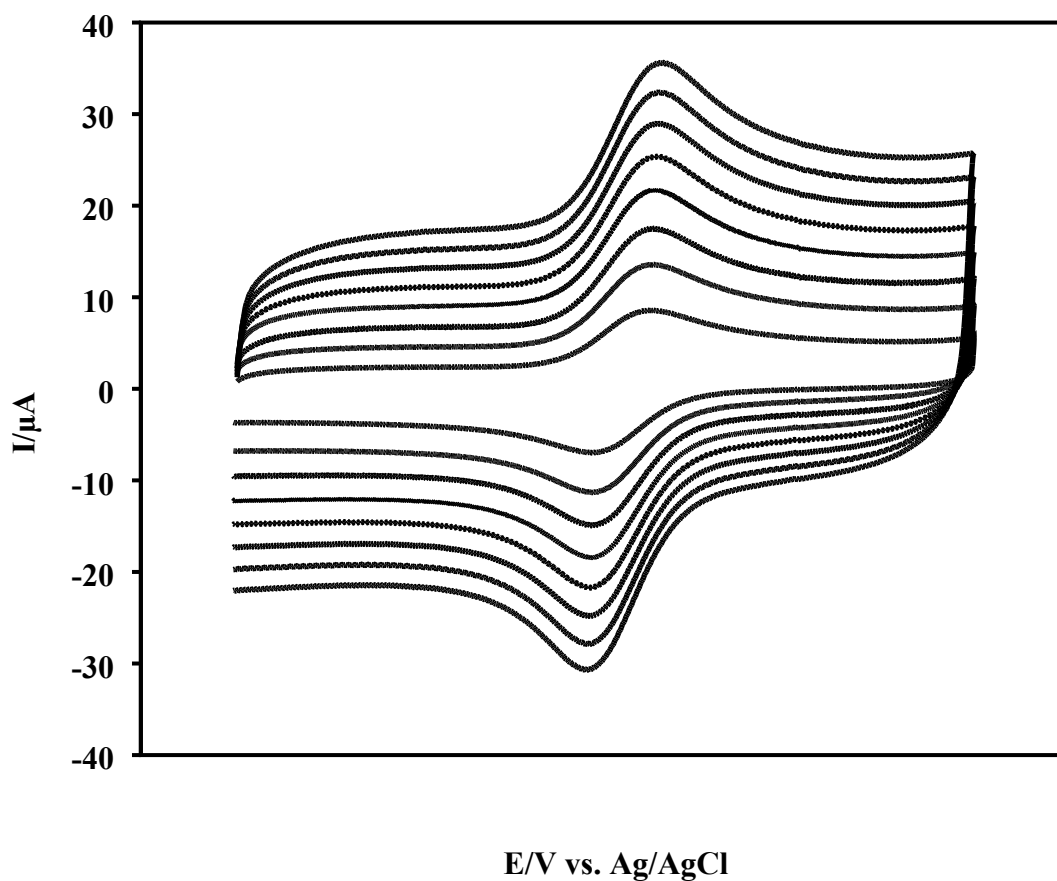

**Fig. S6.** Cyclic voltammograms of 1 mM potassium ferrocyanide in 0.1 M KCl, pH 4 at different scan rates using CNTs/GCE. Scan rates: 25 mV; 50 mV; 75 mV; 100 mV; 125 mV; 150 mV; 175 mV; 200 mV.

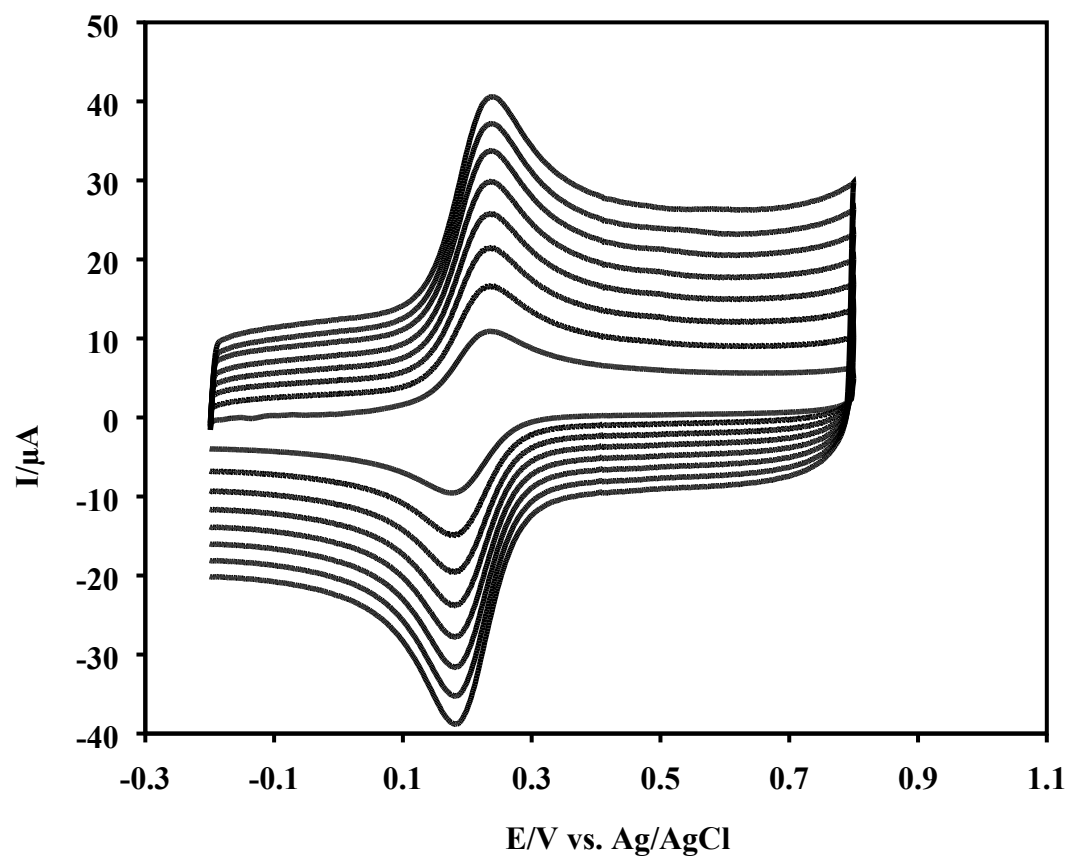

**Fig. S7.** Cyclic voltammograms of 1 mM potassium ferrocyanide in 0.1 M KCl, pH 4 at different scan rates using Tb<sub>4</sub>O<sub>7</sub>NPs/CNTs/GCE. Scan rates: 25 mV; 50 mV; 75 mV; 100 mV; 125 mV; 150 mV; 175 mV; 200 mV.



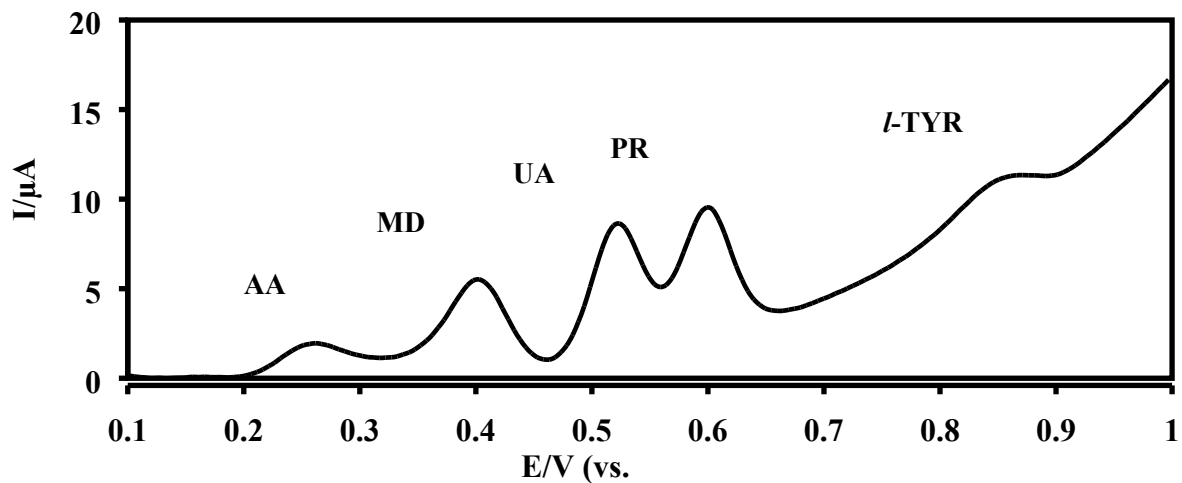

**Fig. S8.** A SWV of  $5.0 \times 10^{-7}$  M MD and  $5.0 \times 10^{-7}$  M PR at  $\text{Tb}_4\text{O}_7\text{NPs/CNTs/GCE}$  in 100 times diluted human urine with 0.1 M PBS at pH 4.0. Frequency: 22 Hz. Step potential: 100 mV/s. Amplitude: 50 mV/s.

**Table S1.** Peak currents and peak potentials of MD and PR at various electrodes.

| Electrodes                                    | Ipa/ $\mu$ A |      | Epa/V |      | Epc/V |      | $\Delta$ Ep(Epa-Epc)/mV |     | Peak to peak seperation |
|-----------------------------------------------|--------------|------|-------|------|-------|------|-------------------------|-----|-------------------------|
|                                               | MD           | PR   | MD    | PR   | MD    | PR   | MD                      | PR  | Epa(MD)-Epa(PR)/mV      |
| a) GCE                                        | 1.15         | 2.12 | 0.58  | 0.68 | 0.45  | 0.58 | 130                     | 100 | 100                     |
| b) Tb <sub>4</sub> O <sub>7</sub> NPs/GCE     | 1.22         | 2.04 | 0.52  | 0.65 | 0.42  | 0.60 | 100                     | 50  | 130                     |
| c) CNTs/GCE                                   | 4.43         | 4.75 | 0.43  | 0.63 | 0.41  | 0.61 | 20                      | 20  | 200                     |
| D Tb <sub>4</sub> O <sub>7</sub> NPs/CNTs/GCE | 12.2         | 12.8 | 0.41  | 0.62 | 0.40  | 0.61 | 10                      | 10  | 210                     |

**Table S2.** Recoveries of MD and PR in urine sample

| Added (nM) |     | MD          |      |           | PR          |      |           |
|------------|-----|-------------|------|-----------|-------------|------|-----------|
| MD         | PR  | Found (nM)  | RSD% | Recovery% | Found (nM)  | RSD% | Recovery% |
| 10         | 10  | 9.85±0.30   | 3.0  | 98.5      | 10.15±0.36  | 3.5  | 101.5     |
| 50         | 50  | 49.55±1.24  | 2.5  | 99.1      | 51.15±1.53  | 3.0  | 102.3     |
| 500        | 500 | 506.5±10.13 | 2.0  | 101.3     | 515.0±16.48 | 3.2  | 103.0     |

Mean ± standard deviation (n = 5)
